1 **Alteration of gut microbiota with rifampicin does not impair maternal care in**  
2 **the European earwig**

3 Sophie Van Meyel\*, Séverine Devers, Simon Dupont, Franck Dedeine and Joël Meunier

4 Institut de Recherche sur la Biologie de l’Insecte, UMR 7261 CNRS – Université de Tours, Tours,

5 France

6 \*Corresponding author: S. Van Meyel, [sophie.vanmeyel@univ-tours.fr](mailto:sophie.vanmeyel@univ-tours.fr)

## ABSTRACT

7 The microbes residing within the gut of an animal host often maximise their own fitness by  
8 modifying their host's physiological, reproductive, and behavioural functions. Whereas recent  
9 studies suggest that they may also shape host sociality and therefore have critical effects on  
10 animal social evolution, the impact of the gut microbiota on maternal care remains unexplored.  
11 This is surprising, as this social behaviour is widespread among animals, often determines the  
12 fitness of both juveniles and parents, and is essential in the evolution of complex animal  
13 societies. Here, we address this gap in knowledge by testing whether life-long alterations of the  
14 gut microbiota with rifampicin - a broad-spectrum antibiotic - impair the expression of pre- and  
15 post-hatching maternal care in the European earwig, an insect exhibiting extensive forms of  
16 maternal care towards eggs and juveniles. Our results first confirm that rifampicin altered the  
17 mothers' gut microbial communities and revealed that the composition of the gut microbiota  
18 differs before and after egg care. Contrary to our predictions, however, the rifampicin-induced  
19 alterations of the gut microbiota did not modify the expression of pre- or post-hatching care.  
20 Independent of maternal care, rifampicin increased the females' feces production and resulted  
21 in lighter eggs and juveniles. By contrast, rifampicin altered none of the other 23 physiological,  
22 reproductive and longevity traits measured over the females' lifetime. Overall, these findings  
23 reveal that altering the gut microbiota does not necessarily affect host sociality. More  
24 generally, our results emphasize that not all animals have evolved a co-dependence with their  
25 microbiota.

26 **Keywords:** Antibiotic, Dermaptera, Insect, Microbiome, Parental care

27

## 28 1-INTRODUCTION

29 Almost all animals harbour a gut microbiota, i.e. a community of microorganisms  
30 residing within the gut of the host [1]. Some of these gut microbes have long been known for  
31 their pathogenic effects in the hosts [2] and others for the benefits they provide to the hosts in  
32 terms of nutritional mutualism [3]. Over the last decades, however, a growing number of works  
33 has been revealing that the effects of gut microbes are much more diverse than previously  
34 thought and shape numerous physiological, reproductive, and behavioural functions of the host  
35 [4]. In the fruit fly *Drosophila melanogaster*, for instance, the gut microbiota is associated with  
36 hormone signalling, metabolism and ageing [5]. Gut microbes can also shape the hosts'  
37 immunocompetence and resistance against pesticides and toxic plant metabolites [6], such as  
38 in the mosquito *Anopheles stephensi* [7], the bean bug *Riptortus pedestri* [8] and the wasp  
39 *Nasonia vitripennis* [9]. Similarly, the gut microbiota is a key parameter in host reproduction  
40 and mating incompatibilities, as found in the fruit fly *Bactrocera minax* [10], in the terrestrial  
41 isopod *Armadillidium vulgare* [11], and the parasitic wasp *Asobara tabida* [12]. Finally, gut  
42 microbes shape the expression of numerous host behaviours, such as nutritional preference  
43 and kin recognition in *D. melanogaster* [13,14], offspring activity in the stinkbug *Megacopta*  
44 *punctissima* [15], and different behavioural tasks in honeybees [16].

45 In addition to these multiple effects, recent studies suggest that gut microbiota also play  
46 a critical role in the sociality of their hosts by shaping the expression and nature of social  
47 interactions among group members. For instance, individuals with an altered gut microbiota  
48 exhibited deficient sociability and increased social avoidance in family-living rats [17,18], as well  
49 as showed higher levels of aggressiveness toward conspecifics in colonies of the leaf-cutting ant

50 *Acromyrmex echinator* [19]. Experimental alterations of gut microbial communities also  
51 rendered hosts less attractive to conspecifics both in the gregarious German cockroach *Blattela*  
52 *germanica* [20] and in the swarm-living desert locust *Schistocerca gregaria* [21]. Most of these  
53 social alterations were reverted when individuals received transplants of their original gut  
54 microbiota [17–20], suggesting that certain microbes and/or the gut community as a whole  
55 were responsible for the sociality of their host and thus, more generally, supporting the  
56 hypothesis that gut microbes could have a key role in the evolution of their hosts' social life.

57         Despite these apparent links between the hosts' gut microbial communities and their  
58 social behaviours, the role of gut microbes on the expression of parental care remains  
59 experimentally unexplored. This is surprising, because this form of social behaviour is present in  
60 a large and taxonomically diverse number of animal species [22], has considerable effects on  
61 the fitness of both juveniles and parents [23] and because shedding light on this link may  
62 provide crucial information on the role of gut microbes in the early evolution of complex animal  
63 societies [24]. On one hand, gut microbes may indirectly drive parental care, because parents  
64 are expected to adjust their level of care to their own condition [25] and altered gut microbial  
65 communities can lower these conditions in multiple ways (see above). On the other hand, gut  
66 microbes could serve as a direct promoter of parental care because, by enforcing the  
67 expression of care in adult hosts, parental gut microbes could maximize their chances to reach  
68 novel hosts [26–31](but see [32]). The transfer of gut microbes through parental care has been  
69 reported in several insect species, such as the stinkbug *Parastrachia japonensis* [33], the  
70 Japanese common plataspid stinkbug *Megacopta punctatissima* [34] and the wood cockroach

71 *Cryptocercus punctulatus* [35,36]. However, whether the gut microbiota drives the expression  
72 of parental care remains untested.

73         In this study, we address this gap in knowledge by investigating whether gut microbiota  
74 alteration with rifampicin - a broad-spectrum antibiotic - impaired the expression of pre- and  
75 post-hatching maternal care in the European earwig *Forficula auricularia* L. In this omnivorous  
76 insect, mothers tend their clutch of eggs over winter. During this period, mothers stop their  
77 foraging activity to provide extensive maternal egg care in the forms of protection against  
78 desiccation, predators and pathogens [37,38]. Upon egg hatching, mothers continue tending  
79 their brood of newly emerged juveniles (called nymphs) for two weeks, during which they  
80 provide post-hatching care in the forms of fierce protections against predators, grooming  
81 behaviours, and food provisioning through regurgitation [39,40]. Interestingly, pre-hatching  
82 care allows mothers to transfer microbes exhibiting antifungal properties to their eggshell in  
83 the maritime earwig *Anisolabis maritima* [41], a behaviour that could also occur in the  
84 European earwig [42]. In *F. auricularia*, pre-hatching maternal care is necessary to ensure egg  
85 development and hatching [42], whereas post-hatching maternal care is facultative for the  
86 development and survival of nymphs [43]. Here, we altered the gut microbiota of *F. auricularia*  
87 females by feeding them with rifampicin during their entire adult lifetime (about 14 months)  
88 and measured whether and how this treatment affected gut microbial communities, maternal  
89 care, and other life-history traits. Specifically, we first determined how the antibiotherapy alters  
90 the diversity and the structure of the gut bacterial community of females at two periods of their  
91 life-cycle (before oviposition and at egg hatching) by sequencing 16S rRNA gene (V3-V4 region)  
92 amplicons. We then tested the effects of rifampicin on the expression of four pre- and two

93 post-hatching forms of maternal care. Finally, to disentangle whether the potential link  
94 between gut microbiota alteration and the level of maternal care is direct and/or indirect, we  
95 investigated the effects of rifampicin on 32 other traits measured throughout the females'  
96 lifetime and reflecting their general physiological state, reproductive success and longevity, as  
97 well as their juveniles' development, sex-ratio and survival.

98

## 99 **2-MATERIALS AND METHODS**

### 100 *2.1 Insect rearing and rifampicin treatment*

101 The experiment involved a total of 296 *Forficula auricularia* L. (clade B [44]) males and females.  
102 These were the first laboratory-born descendants of 74 females field-sampled in Pont-de-Ruan,  
103 France, in 2017 and then maintained under standard laboratory conditions [45]. For each of  
104 these 74 families, 2 males and 2 females were isolated at adult emergence and immediately fed  
105 with a standard food mixed with either 10  $\mu$ L of rifampicin (1 male and 1 female per family;  
106 Sigma-Aldrich, PHR1806; 0.2 mg/ml) or 10  $\mu$ L of water (1 male and 1 female per family). The  
107 standard food contained agar, carrots, pollen, and cat and bird dry food [45]. Two weeks later,  
108 148 mating pairs were set up (1 female and 1 male from the same family and same treatment).  
109 The use of sibling pairs allowed us limiting the risk of cytoplasmic incompatibility due to inter-  
110 familial microbiome variability, and there are only limited signs of inbreeding depression in this  
111 species [46]. They continued to receive the same rifampicin- and water-treatment for about  
112 two months. At that time, females were isolated to mimic natural dispersal for oviposition [45].  
113 From oviposition to egg hatching, four forms of egg care were measured (details below). During  
114 that time, females were not provided with food and thus not treated with rifampicin, as

115 mothers typically stop foraging during the period of egg care [43]. One day after egg hatching,  
116 each family (a mother with its newly hatched juveniles) was provided with either rifampicin or  
117 water to follow up on the pre-oviposition treatment. Three forms of maternal care towards  
118 juveniles were measured during the following 14 days (details below), which corresponds to the  
119 natural duration of family life [45]. At the end of these 14 days, families were split to allow  
120 newly isolated mothers to produce a 2<sup>nd</sup> clutch and permit groups of nymphs to continue their  
121 development. The mothers and groups of nymphs continued to receive the same treatment  
122 (rifampicin or water) until the end of the experiment, i.e. until the mother died and nymphs  
123 reached adulthood. Throughout the experiment, the treatments were renewed twice a week  
124 (except during egg care). All isolated adults, groups of nymphs, and families were maintained in  
125 Petri dishes (diameter 9 cm) lined with moistened sand. More details on the experimental  
126 setup in the supplementary material.

127 Rifampicin is considered one of the most potent and broad-spectrum antibiotics due to  
128 its high-affinity binding to the RNAP  $\beta$  subunit, which causes the inhibition of the bacterial DNA-  
129 dependent RNA polymerase RNAP by directly blocking the RNA elongation path [47]. It is also  
130 commonly used to experimentally alter gut microbial communities in insects (e.g. [48–50]). The  
131 high dose of rifampicin used in this study (about 10 times higher than the dose generally used  
132 in smaller insect species [49,50]) was chosen to ensure gut microbial alteration and because it  
133 did not trigger an excess of mortality in the German cockroach [48], an insect that is about the  
134 size of the European earwig.

135

136 *2.2 Effects of rifampicin on the gut microbiota*

137 To determine whether and how rifampicin treatment altered the earwigs' gut microbial  
138 communities, we extracted the gut of 10 females per treatment (n total = 20) on the day we  
139 observed the first oviposition (i.e. about 2 months after being fed with or without rifampicin),  
140 and 10 rifampicin- and 8 water-treated females one day after egg hatching (i.e. about 1 month  
141 later). For gut extraction, we first anaesthetized each female for 2 min at -20°C and then  
142 dissected them in a watch glass with sterilized double Q water. All dissections and  
143 manipulations were conducted on a sterilized bench, under a Bunsen burner's sterility area and  
144 using sterile material. Whole individual guts were extracted, placed in 100 µl of T1 extraction  
145 buffer (Nucleo-Spin Tissue, Macherey-Nagel), and stored at -80°C until DNA extraction.  
146 Protocol for DNA extractions is detailed in the supplementary material. Two PCR amplifications  
147 were performed for each sample in a final volume of 35 µl to amplify a 450-bp portion of the  
148 V3-V4 region of the 16S rRNA gene (forward primer: 5'-CTT TCC CTA CAC GAC GCT CTT CCG  
149 ATC **TAC GGR AGG CAG CAG**-3'; reverse primer: 5'-GGA GTT CAG ACG TGT GCT CTT CCG ATC  
150 **TTA CCA GGG TAT CTA ATC**-3'); the Illumina adapters and primers *per se* appeared in non-bold  
151 and bold, respectively). Fifty microliters of PCR product were then sent to the GeT-PlaGe  
152 genomic platform (GenoToul, Toulouse, France), which performed library preparation and 2 ×  
153 250 paired-end Illumina Miseq sequencing according to the manufacturer's instructions.  
154 Protocols of the sequencing process and bioinformatic pipelines are detailed in the  
155 supplementary material.

156

157 *2.3 Measurements of pre- and post-hatching maternal care*



158 We measured the effects of rifampicin on four classical forms of earwig maternal egg care: egg  
159 grooming, egg defence, delay of maternal return and egg searching exploration rate [38,51].  
160 Egg grooming, which is used by earwig females to deposit chemical substances on the eggs and  
161 to clean eggshell from dirt and fungi [42], was measured 15 days after egg production. We first  
162 isolated each mother for 30 min, then returned them to their Petri dish and gently deposited  
163 them at a distance of 5 cm from their egg clutch, and finally recorded their behaviours for the  
164 subsequent 15 minutes on camera (SONY© Handycam HDR-CX700 camera). The resulting  
165 movies were analysed using the software BORIS v4.0.3 [52] and the total duration of egg  
166 grooming was defined as the total amount of time each female spent on cleaning eggs with  
167 their mandibles [42]. Clutch defence, which reflects the females' willingness to protect their  
168 eggs from a predator attack [53], was measured 16 days after egg production. We standardly  
169 poked each female on the pronotum with a glass capillary (one poke per second) and then  
170 recorded the number of pokes required until the female moved more than one body length  
171 away from the clutch. The delay of maternal return after clutch abandonment [38], which  
172 represents the delay after which females return to their clutch after being chased away by a  
173 simulated predator attack [53], was measured by recording the time the female took to return  
174 to its clutch just after the end of the clutch defence measurement. Finally, the egg searching  
175 exploration rate, which represents the level of exploration of a novel area by a mother looking  
176 for her eggs, was measured 21 days after egg production. We removed each mother from its  
177 clutch of eggs, subsequently deposited it at the centre of a square arena (W: 9 cm; L: 9 cm; H:  
178 0.5 cm) covered by a glass sheet, and then video-tracked its activity during the following 35

179 min. The video was done under infra-red light, while the individual video tracking and  
180 calculation of exploration rate were conducted using the software ToxTrac v2.83 [54].

181 We then measured the effects of rifampicin on two classical forms of post-hatching  
182 maternal care: the defence of and search for juveniles [51,53]. These two forms of care were  
183 measured 10 days and 12 days after egg hatching, respectively, following the above-detailed  
184 protocols for egg defence and egg searching activity. All the measurements of pre- and post-  
185 hatching maternal care were conducted in the afternoon and under a red light as earwigs are  
186 nocturnal. These measurements were conducted blindly regarding the treatments (rifampicin  
187 versus control). The number of replicates for each of our measurements ranged from 21 to 56  
188 (details in Tables 1 and S1).

189

#### 190 *2.4 Measurements of the 24 other life-history traits in mothers and offspring*

191 We tested the effects of rifampicin on 7 proxies of female physiology, 16 proxies of female  
192 reproduction and on female longevity using standard protocols [45,55]. We measured the  
193 females' physiology through their feces production (reflecting their digestive/foraging activity)  
194 and weight gains between two life stages. Feces production was measured two months after  
195 the beginning of the treatments. Females were isolated in a new Petri Dish for 24 hours, after  
196 which we counted the number of feces pellets present on the ground. The weight gains of each  
197 female were measured between the days of adult emergence and oviposition, and between the  
198 days of oviposition and egg hatching. Reproductive success was measured in the 1<sup>st</sup> and 2<sup>nd</sup>  
199 clutches (if any), by counting the number of eggs produced, the number of days between  
200 oviposition and egg hatching (egg development time), and by measuring the mean egg weight

201 at oviposition, the egg hatching rate, and the mean offspring weight at egg hatching. We also  
202 counted the number of days between adult emergence and oviposition (delay until oviposition),  
203 between the females' isolation after family life and 2<sup>nd</sup> clutch oviposition (delay until 2<sup>nd</sup> clutch  
204 production), and between adult emergence and death (female longevity). We finally assessed  
205 the females' likelihood to produce a 2<sup>nd</sup> clutch (1 or 0) and the females' reproductive allocation  
206 between the two clutches (i.e. the females' reproductive strategy [45]). This allocation was  
207 defined as the number of 2<sup>nd</sup> clutch eggs divided by the total number of eggs produced by a  
208 female.

209 Because mothers and groups of nymphs continued to receive their treatment after the  
210 end of family life, we also tested the effects of rifampicin on juvenile developmental time  
211 between each developmental instar, on the survival rates from egg hatching until both the end  
212 of family life and adulthood, and on the sex ratio of the resulting adults. Juvenile  
213 developmental time was defined as the differences between the moulting date in a given instar  
214 (or hatching date) and the moulting date of its subsequent instar at the family-level, i.e.  
215 focusing on the first individual moulting in the clutch. Every weighing was done to the nearest  
216 0.01 mg using a microbalance (OHAUS© Discovery DV215CD). Sample sizes for each  
217 measurement are detailed in Tables 1 and S1. More details on the methods are provided in the  
218 supplementary material.

## 219 *2.6 Statistical analyses*

220 *Analyses of the  $\alpha$  and  $\beta$ -diversity indices.* The structure, composition and diversity of the  
221 microbial communities were analysed using PHYLOSEQ R package [56] implemented in the

222 FROGSSTAT Phyloseq tools [57]. Diversity within the gut microbial communities (alpha-  
223 diversity) was assessed using two richness indices which estimate the number of species in the  
224 microbiome with correction for subsampling (Chao1; ACE), and three metrics that aim to  
225 measure diversity by accounting for evenness or homogeneity (Shannon, Simpson, Inverse  
226 Simpson, and Fisher) [58]. Diversity between the gut microbial communities (beta-diversity)  
227 was assessed using two non-phylogenetically informed (Bray Curtis dissimilarity; Jaccard indice)  
228 and two phylogenetically informed (uniFrac; Weighed uniFrac) measures of community  
229 similarity. The metrics were analysed individually using either a General Linear Model for  $\alpha$ -  
230 diversity, or a Permutational Multivariate Analysis of Variance Using Distance Matrices  
231 (PERMANOVA) for  $\beta$ -diversity. In these models, the values (or distance matrix for  $\beta$ -diversity) of  
232 each index were entered as a response variable, while the treatment (rifampicin or water), the  
233 sampling stage of the female (before oviposition or at egg hatching) and the interaction  
234 between them were used as fixed factors. When required, a post-hoc analysis was conducted  
235 by splitting the data set according to the sampling stage and then conducting PERMANOVA on  
236 each of the resulting subsets.

237

238 *Analyses of the life-history traits.* Although the presented experimental design was originally  
239 paired, i.e. 2 females per family distributed among the two treatments, the 38 life-history traits  
240 were often measured in only one of the paired individuals (detailed sample sizes in Tables 1 and  
241 S1). This was mostly due to time constraints, and because some females died during the 18-  
242 months course of this experiment. These overall led to critical reductions in the number of  
243 replicates that could be involved in a paired statistical approach (details in Table S2). We,

244 therefore, analysed the effects of rifampicin on the 32 measurements using a series of 31 exact  
245 Mann Whitney U tests and 1 Pearson's Chi-squared test (for the likelihood to produce a 2<sup>nd</sup>  
246 clutch), in which we compared the values of all the available replicates fed with rifampicin to  
247 the values of all the available replicates fed with water. Note that the results do not  
248 qualitatively change when we use paired analyses with the associated smallest sample sizes  
249 (results presented in Table S2). To correct for the inflated risk of Type I errors due to multiple  
250 testing, all p-values were adjusted using the False Discovery Rate (FDR) method [59]. All these  
251 analyses were conducted using the software R v4.0.2 ([www.r-project.org](http://www.r-project.org)).

### 3-RESULTS

#### 252 *3.1 Description of the earwig gut microbiota*

253 A total of 1636435 sequenced reads of the 16S rRNA V3-V4 region were obtained from the 38  
254 female earwig gut samples. After sequence processing, this number went down to 1130241,  
255 with 21069 to 35385 sequences per sample (median = 30595.5). The sequences were  
256 aggregated and filtered in a total of 161 unique OTUs, which were resolved down to the family  
257 or genus level to increase the confidence in the taxonomic assignment. All detailed information  
258 on OTUs is given in Table S3. More than 99.90% of the sequences were assigned to four  
259 bacterial phyla: Proteobacteria (65.94%), Firmicutes (21.12%), Bacteroidota (9.89%) and  
260 Actinobacteriota (2.96%) (Figure 1). The remaining OTUs were assigned to Bdellovibrionota  
261 (0.04%) and Patescibacteria (0.04%).

#### 262 *3.2 Comparative analyses of the $\alpha$ and $\beta$ diversity of the gut microbiota*

263 The gut microbial  $\alpha$ -diversity (i.e. species richness) decreased between oviposition and egg  
264 hatching when this diversity was measured using Chao1 ( $F_{1,34} = 21.63$ ,  $P < 0.0001$ ), ACE ( $F_{1,34} =$   
265  $24.46$ ,  $P < 0.0001$ ) and Fisher ( $F_{1,34} = 20.85$ ,  $P < 0.0001$ ; Figure 2) indices. This decrease was,  
266 however, not significant when  $\alpha$ -diversity was measured using Shannon ( $F_{1,34} = 3.18$ ,  $P = 0.084$ ;  
267 Figure 2) and Simpson ( $F_{1,34} = 1.60$ ,  $P = 0.214$ ) indices. The  $\alpha$ -diversity was overall independent  
268 of the rifampicin treatment (Chao1:  $F_{1,34} = 0.72$ ,  $P = 0.401$ ; ACE:  $F_{1,34} = 0.62$ ,  $P = 0.435$ ; Fisher:  
269  $F_{1,34} = 0.59$ ,  $P = 0.447$ ; Shannon:  $F_{1,34} = 1.67$ ,  $P = 0.205$ ; Simpson:  $F_{1,34} = 0.55$ ,  $P = 0.465$ ; Figure  
270 2), and of an interaction between female sampling stage and rifampicin treatment (all  $P >$   
271  $0.525$ ).

272 The gut microbiota  $\beta$ -diversity (i.e. species composition) overall changed with female  
273 sampling stage and rifampicin treatment. This was the case with the four measured indices of  
274  $\beta$ -diversity: Bray-Curtis (Stage:  $F_{1,34} = 5.77$ ,  $P < 0.0001$ ; Rifampicin:  $F_{1,34} = 4.23$ ,  $P < 0.0001$ ),  
275 JACCARD (Stage:  $F_{1,34} = 7.76$ ,  $P < 0.0001$ ; Rifampicin:  $F_{1,34} = 2.37$ ,  $P = 0.0036$ ), unweighted  
276 UniFrac (Stage:  $F_{1,34} = 6.51$ ,  $P < 0.0001$ ; Rifampicin:  $F_{1,34} = 3.39$ ,  $P = 0.0006$ ) and weighted  
277 UniFrac (Stage:  $F_{1,34} = 14.10$ ,  $P < 0.0001$ ; Rifampicin:  $F_{1,34} = 6.42$ ,  $P = 0.0006$ ). In particular,  
278 females before oviposition harboured less Actinobacteriota and Proteobacteria compared to  
279 females at egg hatching, while rifampicin females overall harboured less Bacteroidota and more  
280 Firmicutes compared to untreated females (Figure 1). Interestingly, the interaction between  
281 female sampling stage and rifampicin had no effect on the  $\beta$ -diversity measured using all (all  $P >$   
282  $0.117$ ) but the weighted UniFrac indices ( $F_{1,34} = 2.94$ ,  $P = 0.026$ ). This interaction reflected an  
283 effect of rifampicin on the  $\beta$ -diversity before oviposition ( $F_{1,34} = 0.17$ ,  $P = 0.018$ ) but not at egg  
284 hatching ( $F_{1,34} = 0.97$ ,  $P = 0.356$ ).

285 *3.3 Rifampicin and maternal care*

286 We did not detect any effect of rifampicin on the six measured forms of egg and nymph care  
287 (Table 1). In particular, rifampicin- and control-fed mothers spent the same amount of time in  
288 egg grooming (Figure 3A), showed the same levels of both egg and juvenile defences against a  
289 simulated predator attack (Figures 3B and 3E), exhibited the same delay to return to their eggs  
290 after egg defence (Figure 3C) and showed comparable exploration rates when looking for their  
291 eggs or their juveniles (Figures 3D and 3F).

292 *3.4 Rifampicin and female's physiology, reproduction, and longevity*

293 The consumption of rifampicin altered 3 of the 23 measured proxies of female physiology,  
294 reproduction, and longevity. In particular, females fed with rifampicin produced on average  
295 twice as many feces pellets per 24h (Figure 4; Table 1), had newly hatched nymphs that were  
296 15% lighter ( $W = 1244$ ,  $P = 0.002$ , adjusted- $P = 0.025$ ; Table S1) and laid 2<sup>nd</sup> clutch eggs that  
297 were 7% lighter ( $W = 628$ ,  $P = 0.002$ , adjusted- $P = 0.025$ ; Table S1) compared to control females.  
298 By contrast, we did not detect any effect of rifampicin on the 20 other traits (Tables 1 and S1).

299 *3.5 Rifampicin and nymphs' development, sex-ratio and survival*

300 We did not detect any effect of rifampicin on the juveniles' developmental speed from hatching  
301 to adult and at every step of their development, as well as the sex-ratio of the 1<sup>st</sup> clutches  
302 (Tables 1 and S1). Similarly, the survival rate of nymphs throughout family life (i.e. from egg

303 hatching until day fourteen) and from the end of family life until they reached adulthood were  
304 not impacted by the consumption of rifampicin (Tables 1 and S1).

#### 4-DISCUSSION

305 Whereas gut microbial communities shape the physiology, reproduction and behaviours of a  
306 great diversity of hosts, their importance on parental care – a key behaviour in social evolution  
307 [22–24] - remains poorly explored [31]. In this study, we addressed this gap in knowledge by  
308 treating females of the European earwig with rifampicin and measuring the effects on gut  
309 microbial communities, maternal care and female physiology, reproduction, and longevity. Our  
310 results first reveal that rifampicin altered the composition of the gut microbial community of  
311 earwig females and show that this modification diminishes during the period of egg care.  
312 Contrary to our predictions, however, the rifampicin-induced alterations of gut microbial  
313 communities did not impair the expression of pre- or post-hatching care: rifampicin-treated and  
314 control mothers showed similar levels of egg grooming, clutch defences against a predator,  
315 maternal return and clutch searching. Independent of maternal care, our results reveal that the  
316 consumption of rifampicin increased the females' production of feces pellets, as well as lead to  
317 the production of lighter nymphs and lighter 2<sup>nd</sup> clutch eggs. By contrast, rifampicin affected  
318 none of the other 23 physiological, reproductive and longevity traits measured over the  
319 females' lifetime.

320 Our experiment first demonstrates that the ingestion of rifampicin by earwig females  
321 induced stage-specific modifications in the species composition ( $\beta$ -diversity) of the gut  
322 microbiota but did not shape its species richness ( $\alpha$ -diversity). These findings confirm that the



323 earwig gut microbiota harbours both bacterial taxa (and/or genetic variants of certain taxa) that  
324 are sensitive and taxa that are resistant to rifampicin, and thus that our treatment successfully  
325 altered gut microbial communities (just like in other animal species [48–50]). Independent of  
326 rifampicin, our data also reveal that both  $\alpha$ - and  $\beta$ -diversity changed from pre-oviposition to  
327 egg hatching. This stage-specific pattern may result from the absence of food intake for about  
328 four weeks before gut sampling in females at egg hatching compared to before oviposition [60],  
329 and/or from the different rearing temperatures [61] and differences in female age [62]  
330 between the two life stages. Notwithstanding the drivers of this stage-specific effect, it is  
331 important to note that all the tested females were re-treated with rifampicin (or water) after  
332 egg hatching so that the resulting alteration of their gut microbiota reported at oviposition  
333 likely operated during their entire lifetime and could thus have affected all the traits measured  
334 after egg-hatching.

335         Although gut microbial communities shape the expression of hosts sociality in numerous  
336 vertebrate and arthropod species [17–21], our findings reveal that rifampicin-induced  
337 alterations of this community did not affect the expression of pre- and post-hatching maternal  
338 care in earwigs. Gut microbes were expected to directly drive the expression of parental care,  
339 because enforcing the expression of this social behaviour may allow symbionts to reach new  
340 hosts (i.e. offspring) that are typically young (thus offering long-lived habitats), display poor  
341 immune defences (thus facilitating bacterial establishment and development [63]) and harbour  
342 only a few resident microbes (thus limiting the risk of competition within the microbiome [29]).  
343 This absence of a link between rifampicin and maternal care may first suggest that earwig  
344 parental care is shaped by microbes that are non-sensitive to rifampicin. In insects, gut

345 microbial communities do not only encompass a broad diversity of bacteria (among which some  
346 are resistant to rifampicin) but also fungi, protists and other microorganisms that could have  
347 key roles in hosts biology [41,64,65]. Even if the previous experimental works linking gut  
348 microbiota and host sociality focused on bacteria [17–21], future studies will be required to  
349 confirm that no other members of the gut microbiota shape parental care in our study species.  
350 A second hypothesis is that microbial symbionts never developed any specific capabilities to  
351 manipulate host sociality, either because adapted strain never occurred within the microbial  
352 populations associated with these earwig species (or populations), or because certain  
353 antagonistic interactions (e.g. competition) among the members of the microbial community  
354 have prevented the emergence of host social manipulation. Any symbiont species (or strain)  
355 investing its resources to manipulate host behaviour is indeed expected to be outcompeted  
356 within the microbiome by other species or variants that, instead, direct their resources into  
357 growth, survival or directly transmission [32](but see for the evolution of paternal care [31]).  
358 Finally, a third hypothesis is that the symbionts' capability to manipulate host sociality may  
359 have changed and/or disappeared during host social evolution and consequently vanished in  
360 the European earwig. The evolutionary drivers of family life indeed change over time [24] and,  
361 while gut microbes may have (at least partly) driven the ancestral evolutionary shift from  
362 solitary to family living for the reasons detailed above, the resulting benefits of parental care  
363 for the hosts could have consolidated the expression of care and thus reduced the capability of  
364 symbionts to control host social behaviours and/or reduced the sensitivity of the hosts to this  
365 manipulation. Based on this hypothesis, alterations in gut microbial communities should not  
366 shape the expression of parental care once this behaviour is established. In earwigs, pre- and

367 post-hatching maternal care are well established (even if their levels of expression differ  
368 between females and the associated benefits appear to be limited for juveniles [43,53]), which  
369 may thus have limited the maintenance of symbiont control over parental care. Overall, our  
370 findings provide the first experimental evidence that alteration of the gut microbiota (with  
371 rifampicin) does not directly or indirectly impair the expression of maternal care and thus  
372 emphasize the potentially limited role of the gut microbiota in this important social behaviour.

373         Despite its apparent lack of effects on maternal care, rifampicin altered three female  
374 life-history traits related to physiology and reproduction. The first trait is the production of  
375 feces pellets, which was twice as high in rifampicin-treated compared to control females. This  
376 result was not surprising, as the gut microbiota often plays a key role in nutrient extraction and  
377 digestion [66] and its alteration by antibiotics typically disturbs the host's digestive efficiency  
378 and triggers an overproduction of fecal material. The two other traits were the weights of the  
379 2<sup>nd</sup> clutch juveniles and 2<sup>nd</sup> clutch eggs, which were lighter in rifampicin compared to control  
380 females. Light eggs and newly hatched juveniles are often thought to reflect low offspring  
381 quality in insects [67]. In the present study, however, heavier eggs and newly hatched juveniles  
382 did not translate into higher offspring survival and improved development compared to lighter  
383 counterparts. On a proximate level, these findings suggest that rifampicin breaks the  
384 association between offspring weight and quality, either due to alteration in gut microbial  
385 communities and/or antibiotic toxicity. More generally, these findings stress that rifampicin  
386 only has a limited impact on offspring fitness, as least under laboratory conditions.

387         Rifampicin altered none of the 23 others developmental, physiological, reproductive and  
388 longevity traits measured in earwig mothers and offspring. Whereas these findings contrast

389 with a large body of literature showing the broad impact of altered gut microbial communities  
390 on host biology [4], they are in line with a few recent studies showing that antibiotic-induced  
391 alteration of gut microbial communities does not affect development and survival of the three  
392 Lepidopteran *Danaus chrysippus*, *Ariadne merione* and *Choristoneura fumiferana* [68–70].  
393 Together with these findings, our results thus provide support to the idea that essential  
394 microbial symbioses are not universal across insect species [68,71]. In these three Lepidoptera  
395 species, the lack of microbial symbioses has been explained by the fact that they do not depend  
396 on specific gut bacteria to derive critical nutrition from their dietary resources [70,72,73]. This  
397 might also be the case in the European earwig because it is omnivorous [45] and thus a  
398 partnership with bacteria facilitating the digestion of specific food sources might not have been  
399 required during species evolution. Future works are nevertheless required to test whether (or  
400 which part of) its gut microbiota is transient.

401 To conclude, our study reveals that rifampicin consumption alters female gut microbial  
402 communities in earwigs, but provides no evidence for a link between this alteration and the  
403 expression of parental care, and no evidence for a strong impact of this alteration on earwig  
404 physiology, reproduction and survival. Our study also shows that earwig females harbour  
405 different gut microbial communities before and after the period of egg care, a result in line with  
406 temporal variation in the microbial communities present on eggshells in the maritime earwig  
407 [41]. Overall, these findings provide support to the recent proposal that microbial enforcement  
408 of host social interactions is unlikely to evolve [32] and to the emerging idea that not all animals  
409 have evolved a co-dependence with their microbiome [68,71]. Nevertheless, shedding light on  
410 whether and how a symbiotic community shape hosts biology is a difficult task, mostly due to

411 the number of players possibly involved and the complexity of their potential interactions [69].  
412 Hence, our findings pave the way for follow-up studies testing whether other (non-rifampicin  
413 sensitive) members of the gut microbial community could shape the expression of parental care  
414 in family-living animals and/or drive important fitness parameters of earwig biology.

## 5-ACKNOWLEDGEMENTS

415 We thank Jos Kramer and Maximilian Körner for their comments on this manuscript. This  
416 research has been supported by a research grant from the French Ministry of Research (to  
417 S.V.M.) and a research grant from the ANR (project *MicroSoc* to J.M.).

## 6-DATA ACCESSIBILITY

418 The raw metabarcoding sequence data have been deposited in the NCBI Sequence Read  
419 Archive under the BioProject PRJNA646389 with BioSample accession numbers SAMN15547835  
420 to SAMN15547872. The life-history traits and behaviour analyses reported in this manuscript  
421 can be reproduced using the data and R script available in the public repository server Zenodo  
422 [74].

## 7-REFERENCES

- 423 1. Kolodny O, Callahan BJ, Douglas AE. 2020 The role of the microbiome in host evolution.  
424 *Philos. Trans. R. Soc. B Biol. Sci.* **375**, 20190588. (doi:10.1098/rstb.2019.0588)
- 425 2. Engel P, Moran NA. 2013 The gut microbiota of insects - diversity in structure and  
426 function. *FEMS Microbiol. Rev.* **37**, 699–735. (doi:10.1111/1574-6976.12025)

- 427 3. Cleveland LR. 1923 Symbiosis between termites and their intestinal protozoa. *Proc. Natl.*  
428 *Acad. Sci. U. S. A.* **9**, 424–428. (doi:10.1073/pnas.0913714)
- 429 4. Moran NA, Ochman H, Hammer TJ. 2019 Evolutionary and ecological consequences of  
430 gut microbial communities. *Annu. Rev. Ecol. Syst.* **50**, 20.1-20.25. (doi:10.1146/annurev-  
431 ecolsys-110617-062453-062453)
- 432 5. Broderick NA, Lemaitre B. 2012 Gut-associated microbes of *Drosophila melanogaster*.  
433 *Gut Microbes* **3**. (doi:10.4161/gmic.19896)
- 434 6. Itoh H, Tago K, Hayatsu M, Kikuchi Y. 2018 Detoxifying symbiosis: Microbe-mediated  
435 detoxification of phytotoxins and pesticides in insects. *Nat. Prod. Rep.* **35**, 434–454.  
436 (doi:10.1039/c7np00051k)
- 437 7. Wei G, Lai Y, Wang G, Chen H, Li F, Wang S. 2017 Insect pathogenic fungus interacts with  
438 the gut microbiota to accelerate mosquito mortality. *Proc. Natl. Acad. Sci. U. S. A.* **114**,  
439 5994–5999. (doi:10.1073/pnas.1703546114)
- 440 8. Kikuchi Y, Hayatsu M, Hosokawa T, Nagayama A, Tago K, Fukatsu T. 2012 Symbiont-  
441 mediated insecticide resistance. *Proc. Natl. Acad. Sci. U. S. A.* **109**, 8618–22.  
442 (doi:10.1073/pnas.1200231109)
- 443 9. Wang GH, Berdy BM, Velasquez O, Jovanovic N, Alkhalifa S, Minbiole KPC, Brucker RM.  
444 2020 Changes in microbiome confer multigenerational host resistance after sub-toxic  
445 pesticide exposure. *Cell Host Microbe* **27**, 213-224.e7. (doi:10.1016/j.chom.2020.01.009)
- 446 10. Andongma AA, Wan L, Xue-ping D, Akami M, He J, Clarke AR, Chang-Ying N. 2018 The  
447 impact of nutritional quality and gut bacteria on the fitness of *Bactrocera minax* (Diptera:  
448 Tephritidae). *R. Soc. Open Sci.* **5**. (doi:10.1098/rsos.180237)

- 449 11. Fortin M, Meunier J, Laverré T, Souty-Grosset C, Richard F-J. 2019 Joint effects of group  
450 sex-ratio and *Wolbachia* infection on female reproductive success in the terrestrial  
451 isopod *Armadillidium vulgare*. *BMC Evol. Biol.* **19**, 65. (doi:10.1186/s12862-019-1391-6)
- 452 12. Dedeine F, Vavre F, Fleury F, Loppin B, Hochberg ME, Bouletreau M. 2001 Removing  
453 symbiotic *Wolbachia* bacteria specifically inhibits oogenesis in a parasitic wasp. *Proc.*  
454 *Natl. Acad. Sci. U. S. A.* **98**, 6247–6252. (doi:10.1073/pnas.101304298)
- 455 13. Lizé A, McKay R, Lewis Z. 2014 Kin recognition in *Drosophila*: The importance of ecology  
456 and gut microbiota. *ISME J.* **8**, 469–477. (doi:10.1038/ismej.2013.157)
- 457 14. Wong AC-N, Wang Q-P, Morimoto J, Senior AM, Lihoreau M, Neely GG, Simpson SJ,  
458 Ponton F. 2017 Gut microbiota modifies olfactory-guided microbial preferences and  
459 foraging decisions in *Drosophila*. *Curr. Biol.* **27**, 2397-2404.e4.  
460 (doi:10.1016/j.cub.2017.07.022)
- 461 15. Hosokawa T, Kikuchi Y, Shimada M, Fukatsu T. 2008 Symbiont acquisition alters  
462 behaviour of stinkbug nymphs. *Biol. Lett.* **4**, 45–48. (doi:10.1098/rsbl.2007.0510)
- 463 16. Jones JC, Fruciano C, Marchant J, Hildebrand F, Forslund S, Bork P, Engel P, Hughes WOH.  
464 2018 The gut microbiome is associated with behavioural task in honey bees. *Insectes Soc.*  
465 **65**, 419–429. (doi:10.1007/s00040-018-0624-9)
- 466 17. Buffington SA, Di Prisco GV, Auchtung TA, Ajami NJ, Petrosino JF, Costa-Mattioli M. 2016  
467 Microbial reconstitution reverses maternal diet-induced social and synaptic deficits in  
468 offspring. *Cell* **165**, 1762–1775. (doi:10.1016/j.cell.2016.06.001)
- 469 18. Desbonnet L, Clarke G, Shanahan F, Dinan TG, Cryan JF. 2014 Microbiota is essential for  
470 social development in the mouse. *Mol. Psychiatry* **19**, 146–148.

- 471 (doi:10.1038/mp.2013.65)
- 472 19. Teseo S, van Zweden JS, Pontieri L, Kooij PW, Sørensen SJ, Wenseleers T, Poulsen M,  
473 Boomsma JJ, Sapountzis P. 2019 The scent of symbiosis: gut bacteria may affect social  
474 interactions in leaf-cutting ants. *Anim. Behav.* **150**, 239–254.  
475 (doi:10.1016/j.anbehav.2018.12.017)
- 476 20. Wada-Katsumata A, Zurek L, Nalyanya G, Roelofs WL, Zhang A, Schal C. 2015 Gut bacteria  
477 mediate aggregation in the German cockroach. *Proc. Natl. Acad. Sci. U. S. A.* **112**,  
478 201504031. (doi:10.1073/pnas.1504031112)
- 479 21. Dillon RJ, Vennard CT, Charnley AK. 2000 Exploitation of gut bacteria in the locust. *Nature*  
480 **403**, 851.
- 481 22. Royle NJ, Smiseth PT, Kölliker M. 2012 *The evolution of parental care*. Oxford Uni. Oxford:  
482 Oxford University Press.
- 483 23. Klug H, Bonsall MB. 2014 What are the benefits of parental care? The importance of  
484 parental effects on developmental rate. *Ecol. Evol.* **4**, 2330–2351.  
485 (doi:10.1002/ece3.1083)
- 486 24. Kramer J, Meunier J. 2019 The other facets of family life and their role in the evolution of  
487 animal sociality. *Biol. Rev.* **94**, 199–215. (doi:10.1111/brv.12443)
- 488 25. Klug H, Alonso S, Bonsall MB, Alonzo SH, Bonsall MB. 2012 Theoretical foundations of  
489 parental care. In *The evolution of parental care* (eds NJ Royle, PT Smiseth, M Kölliker), pp.  
490 21–39. Oxford, UK: Oxford University Press.
- 491 26. Lewin-Epstein O, Aharonov R, Hadany L. 2017 Microbes can help explain the evolution of  
492 host altruism. *Nat. Commun.* **8**, 14040. (doi:10.1038/ncomms14040)



- 493 27. Nalepa CA. 2020 Origin of mutualism between termites and flagellated gut protists:  
494 transition from horizontal to vertical transmission. *Front. Ecol. Evol.* **8**, 1–15.  
495 (doi:10.3389/fevo.2020.00014)
- 496 28. Biedermann PHW, Rohlf M. 2017 Evolutionary feedbacks between insect sociality and  
497 microbial management. *Curr. Opin. Insect Sci.* **22**, 92–100.  
498 (doi:10.1016/j.cois.2017.06.003)
- 499 29. Figueiredo ART, Kramer J. 2020 Cooperation and Conflict Within the Microbiota and  
500 Their Effects On Animal Hosts. *Front. Ecol. Evol.* **8**, 1–15. (doi:10.3389/fevo.2020.00132)
- 501 30. Stilling RM, Bordenstein SR, Dinan TG, Cryan JF. 2014 Friends with social benefits: host-  
502 microbe interactions as a driver of brain evolution and development? *Front. Cell. Infect.*  
503 *Microbiol.* **4**, 147. (doi:10.3389/fcimb.2014.00147)
- 504 31. Gurevich Y, Lewin-Epstein O, Hadany L. 2020 The evolution of paternal care: a role for  
505 microbes? *Philos. Trans. R. Soc. B Biol. Sci.* **375**, 20190599. (doi:10.1098/rstb.2019.0599)
- 506 32. Johnson KV, Foster KR. 2018 Why does the microbiome affect behaviour? *Nat. Rev.*  
507 *Microbiol.* **16**, 647–655. (doi:10.1038/s41579-018-0014-3)
- 508 33. Hosokawa T, Hironaka M, Mukai H, Inadomi K, Suzuki N, Fukatsu T. 2012 Mothers never  
509 miss the moment: a fine-tuned mechanism for vertical symbiont transmission in a  
510 subsocial insect. *Anim. Behav.* **83**, 293–300. (doi:10.1016/j.anbehav.2011.11.006)
- 511 34. Fukatsu T, Hosokawa T. 2002 Capsule-transmitted gut symbiotic bacterium of the  
512 Japanese common plataspid stinkbug, *Megacopta punctatissima*. *Appl. Environ.*  
513 *Microbiol.* **68**, 389–396. (doi:10.1128/AEM.68.1.389-396.2002)
- 514 35. Nalepa CA. 1984 Colony composition, protozoan transfer and some life history

- 515 characteristics of the woodroach *Cryptocercus punctulatus* Scudder (Dictyoptera:  
516 Cryptocercidae). *Behav. Ecol. Sociobiol.* , 273–279.
- 517 36. Nalepa CA. 1990 Early development of nymphs and establishment of hindgut symbiosis  
518 in *Cryptocercus punctulatus* (Dictyoptera: Cryptocercidae). *Ann. Entomol. Soc. Am.* **83**,  
519 786–789. (doi:10.1093/aesa/83.4.786)
- 520 37. Lamb RJ. 1976 Parental behaviour in the Dermaptera with special reference to *Forficula*  
521 *auricularia*. *Can. Entomol.* **108**, 609–619.
- 522 38. Van Meyel S, Devers S, Meunier J. 2019 Love them all: Mothers provide care to foreign  
523 eggs in the European earwig *Forficula auricularia*. *Behav. Ecol.* **30**, 756–762.  
524 (doi:10.1093/beheco/arz012)
- 525 39. Staerkle M, Kölliker M. 2008 Maternal food regurgitation to nymphs in earwigs (*Forficula*  
526 *auricularia*). *Ethology* **114**, 844–850. (doi:10.1111/j.1439-0310.2008.01526.x)
- 527 40. Mas F, Kölliker M. 2011 Differential effects of offspring condition-dependent signals on  
528 maternal care regulation in the European earwig. *Behav. Ecol. Sociobiol.* **65**, 341–349.  
529 (doi:10.1007/s00265-010-1051-8)
- 530 41. Greer JA, Swei A, Vredenburg VT, Zink AG. 2020 Parental care alters the egg microbiome  
531 of maritime earwigs. *Microb. Ecol.* (doi:10.1007/s00248-020-01558-x)
- 532 42. Boos S, Meunier J, Pichon S, Kölliker M. 2014 Maternal care provides antifungal  
533 protection to eggs in the European earwig. *Behav. Ecol.* **25**, 754–761.  
534 (doi:10.1093/beheco/aru046)
- 535 43. Kölliker M. 2007 Benefits and costs of earwig (*Forficula auricularia*) family life. *Behav.*  
536 *Ecol. Sociobiol.* **61**, 1489–1497. (doi:10.1007/s00265-007-0381-7)

- 537 44. González-Miguéns R, Muñoz-Nozal E, Jiménez-Ruiz Y, Mas-Peinado P, Ghanavi HR,  
538 García-París M. 2020 Speciation patterns in the *Forficula auricularia* species complex:  
539 cryptic and not so cryptic taxa across the western Palaearctic region. *Zool. J. Linn. Soc.*  
540 (doi:10.1093/zoolinnean/zlaa070)
- 541 45. Meunier J, Wong JWY, Gómez Y, Kuttler S, Röllin L, Stucki D, Kölliker M. 2012 One clutch  
542 or two clutches? Fitness correlates of coexisting alternative female life-histories in the  
543 European earwig. *Evol. Ecol.* **26**, 669–682. (doi:10.1007/s10682-011-9510-x)
- 544 46. Meunier J, Kölliker M. 2013 Inbreeding depression in an insect with maternal care:  
545 influences of family interactions, life stage and offspring sex. *J. Evol. Biol.* **26**, 2209–20.  
546 (doi:10.1111/jeb.12217)
- 547 47. Campbell EA, Korzheva N, Mustaev A, Murakami K, Nair S, Goldfarb A, Darst SA. 2001  
548 Structural mechanism for rifampicin inhibition of bacterial RNA polymerase. *Cell* **104**,  
549 901–912. (doi:10.1016/S0092-8674(01)00286-0)
- 550 48. Rosas T, García-Ferris C, Domínguez-Santos R, Llop P, Latorre A, Moya A. 2018 Rifampicin  
551 treatment of *Blattella germanica* evidences a fecal transmission route of their gut  
552 microbiota. *FEMS Microbiol. Ecol.* **94**, 1–12. (doi:10.1093/femsec/fiy002)
- 553 49. Shan HW, Zhang CR, Yan TT, Tang HQ, Wang XW, Liu SS, Liu YQ. 2016 Temporal changes  
554 of symbiont density and host fitness after rifampicin treatment in a whitefly of the  
555 *Bemisia tabaci* species complex. *Insect Sci.* **23**, 200–214. (doi:10.1111/1744-7917.12276)
- 556 50. Chouaia B *et al.* 2012 Delayed larval development in *Anopheles* mosquitoes deprived of  
557 *Asaia* bacterial symbionts. *BMC Microbiol.* **12**, 1–8. (doi:10.1186/1471-2180-12-S1-S2)
- 558 51. Diehl JM, Meunier J. 2018 Surrounding pathogens shape maternal egg care but not egg

- 559 production in the European earwig. *Behav. Ecol.* **29**, 128–136.
- 560 (doi:10.1093/beheco/arx140)
- 561 52. Friard O, Gamba M. 2016 BORIS: a free, versatile open-source event-logging software for  
562 video/audio coding and live observations. *Methods Ecol. Evol.* **7**, 1325–1330.  
563 (doi:10.1111/2041-210X.12584)
- 564 53. Thesing J, Kramer J, Koch LK, Meunier J. 2015 Short-term benefits, but transgenerational  
565 costs of maternal loss in an insect with facultative maternal care. *Proc. R. Soc. London B*  
566 *Biol. Sci.* **282**, 20151617. (doi:10.1098/rspb.2015.1617)
- 567 54. Rodriguez A, Zhang H, Klaminder J, Brodin T, Andersson PL, Andersson M. 2018 ToxTrac:  
568 A fast and robust software for tracking organisms. *Methods Ecol. Evol.* **9**, 460–464.  
569 (doi:10.1111/2041-210X.12874)
- 570 55. Körner M, Diehl JM, Meunier J. 2016 Growing up with feces: benefits of allo-coprophygy  
571 in families of the European earwig. *Behav. Ecol.* **27**, 1775–1781.  
572 (doi:10.1093/beheco/arw113)
- 573 56. McMurdie PJ, Holmes S. 2013 Phyloseq: An R Package for Reproducible Interactive  
574 Analysis and Graphics of Microbiome Census Data. *PLoS One* **8**.  
575 (doi:10.1371/journal.pone.0061217)
- 576 57. Bernard M, Pascal G, Mariadassou M, Cauquil L, Chaillou S. 2017 FROGS Training on  
577 Galaxy<sup>®</sup>: statistics to explore metagenomics. *HAL* **02788316**, 116.
- 578 58. Jost L. 2007 Partitioning diversity into independent Alpha and Beta components. *Ecology*  
579 **88**, 2427–2439.
- 580 59. Benjamini Y, Hochberg Y. 1995 Controlling the false discovery rate: a practical and

- 581 powerful approach to multiple testing. *J. R. Stat. Soc. Ser. B* **57**, 289–300.  
582 (doi:10.2307/2346101)
- 583 60. Montoya-Ciriaco N, Gómez-Acata S, Muñoz-Arenas LC, Dendooven L, Estrada-Torres A,  
584 Díaz De La Vega-Pérez AH, Navarro-Noya YE. 2020 Dietary effects on gut microbiota of  
585 the mesquite lizard *Sceloporus grammicus* (Wiegmann, 1828) across different altitudes.  
586 *Microbiome* **8**, 1–19. (doi:10.1186/s40168-020-0783-6)
- 587 61. Sepulveda J, Moeller AH. 2020 The effects of temperature on animal gut microbiomes.  
588 *Front. Microbiol.* **11**, 1–9. (doi:10.3389/fmicb.2020.00384)
- 589 62. Anderson KE, Ricigliano VA, Mott BM, Copeland DC, Floyd AS, Maes P. 2018 The queen's  
590 gut refines with age: longevity phenotypes in a social insect model. *Microbiome* **6**, 108.  
591 (doi:10.1186/s40168-018-0489-1)
- 592 63. Vogelweith F, Körner M, Foitzik S, Meunier J. 2017 Age, pathogen exposure, but not  
593 maternal care shape offspring immunity in an insect with facultative family life. *BMC*  
594 *Evol. Biol.* **17**, 69. (doi:10.1186/s12862-017-0926-y)
- 595 64. Urubschurov V, Janczyk P. 2011 Biodiversity of yeasts in the gastrointestinal ecosystem  
596 with emphasis on its importance for the host. In *The Dynamical Processes of Biodiversity*  
597 *- Case Studies of Evolution and Spatial Distribution*, pp. 277–302. (doi:10.5772/24108)
- 598 65. Arcila F, Meunier J. 2020 Friend or foe? The apparent benefits of gregarine (Apicomplexa:  
599 Sporozoa) infection in the European earwig. *Int. J. Parasitol.* **50**, 461–469.  
600 (doi:10.1016/j.ijpara.2020.01.007)
- 601 66. Douglas AE. 2015 Multiorganismal insects: Diversity and function of resident  
602 microorganisms. *Annu. Rev. Entomol.* **60**, 17–34. (doi:10.1146/annurev-ento-010814-

- 603 020822)
- 604 67. Berrigan D. 1991 The allometry of egg size and number in insects. *Oikos* **60**, 313–321.
- 605 68. Phalnikar K, Kunte K, Agashe D. 2019 Disrupting butterfly caterpillar microbiomes does  
606 not impact their survival and development. *Proc. R. Soc. London B Biol. Sci.* **286**.  
607 (doi:10.1098/rspb.2019.2438)
- 608 69. Ravenscraft A, Kish N, Peay K, Boggs C. 2019 No evidence that gut microbiota impose a  
609 net cost on their butterfly host. *Mol. Ecol.* **28**, 2100–2117. (doi:10.1111/mec.15057)
- 610 70. Hammer TJ, Janzen DH, Hallwachs W, Jaffe SP, Fierer N. 2017 Caterpillars lack a resident  
611 gut microbiome. *Proc. Natl. Acad. Sci. U. S. A.* , 1–6. (doi:10.1073/pnas.1707186114)
- 612 71. Hammer TJ, Sanders JG, Fierer N. 2019 Not all animals need a microbiome. *FEMS*  
613 *Microbiol. Lett.* **366**. (doi:10.1093/femsle/fnz117)
- 614 72. Phalnikar K, Kunte K, Agashe D. 2018 Dietary and developmental shifts in butterfly-  
615 associated bacterial communities. *R. Soc. Open Sci.* **5**. (doi:10.1098/rsos.171559)
- 616 73. Chaturvedi S, Rego A, Lucas LK, Gompert Z. 2017 Sources of Variation in the Gut  
617 Microbial Community of *Lycaeides melissa* Caterpillars. *Sci. Rep.* **7**, 1–13.  
618 (doi:10.1038/s41598-017-11781-1)
- 619 74. Van Meyel S, Devers S, Dupont S, Dedeine F, Meunier J. 2020 Alteration of gut microbiota  
620 with rifampicin does not impair maternal care in the European earwig [Data set]. Zenodo.  
621 (doi.org/10.5281/zenodo.4072981)

2 **Table 1.** Effects of rifampicin on a representative selection of 15 of the 36 measured traits reflecting maternal care, female physiology,  
 3 reproduction and longevity, as well as nymph development and survival. The effects of rifampicin on all 36 traits are presented in table S1. P-values  
 4 significant after correction for multiple comparisons (Adj-P) are in bold. Med = Median; 1Q and 3Q = first and third quartile, respectively. N =  
 5 sample size.

|                                                 | Water  |        |        |    | Rifampicin |        |        |    | Statistics |                  |                  |
|-------------------------------------------------|--------|--------|--------|----|------------|--------|--------|----|------------|------------------|------------------|
|                                                 | Med    | 1Q     | 3Q     | N  | Med        | 1Q     | 3Q     | N  | W          | P                | Adj-P            |
| Maternal care                                   |        |        |        |    |            |        |        |    |            |                  |                  |
| Egg grooming (sec)                              | 379.34 | 259.20 | 492.28 | 26 | 359.54     | 264.49 | 450.18 | 22 | 288.5      | 0.963            | 0.963            |
| Egg defense                                     | 12.00  | 7.00   | 27.00  | 55 | 14.00      | 8.00   | 26.75  | 56 | 1397.0     | 0.398            | 0.582            |
| Delay maternal return (sec)                     | 32.00  | 17.00  | 54.00  | 55 | 27.00      | 10.75  | 60.50  | 56 | 1677.5     | 0.417            | 0.582            |
| Egg searching (%)                               | 68.37  | 59.72  | 76.28  | 27 | 69.55      | 50.78  | 81.88  | 24 | 339.5      | 0.775            | 0.807            |
| Juveniles defense                               | 6.00   | 3.00   | 13.50  | 35 | 5.00       | 3.00   | 8.75   | 30 | 592.5      | 0.377            | 0.582            |
| Nymph searching (%)                             | 80.61  | 77.55  | 85.20  | 21 | 84.16      | 77.17  | 89.55  | 22 | 208.0      | 0.584            | 0.716            |
| Female physiology                               |        |        |        |    |            |        |        |    |            |                  |                  |
| Feces production                                | 6.50   | 4.00   | 11.00  | 36 | 13.00      | 10.00  | 14.00  | 36 | 303.0      | <b>&lt;0.001</b> | <b>&lt;0.001</b> |
| Abs. weight gain during egg care (mg)           | 1.28   | -1.28  | 4.82   | 52 | 2.32       | 0.19   | 4.48   | 59 | 1308.0     | 0.182            | 0.407            |
| Female reproduction & longevity                 |        |        |        |    |            |        |        |    |            |                  |                  |
| No. eggs produced in the 1st clutch             | 55.00  | 48.50  | 60.00  | 59 | 53.00      | 43.00  | 58.75  | 62 | 2037.0     | 0.280            | 0.560            |
| No. eggs produced in the 2 <sup>nd</sup> clutch | 28.00  | 20.00  | 33.00  | 33 | 23.00      | 14.00  | 28.50  | 27 | 561.0      | 0.087            | 0.383            |
| Total No. nymphs produced                       | 32.50  | 22.00  | 52.00  | 32 | 21.50      | 7.50   | 32.50  | 28 | 596.5      | 0.027            | 0.203            |
| Female longevity (days)                         | 323.00 | 293.50 | 361.00 | 39 | 306.00     | 284.50 | 343.25 | 42 | 994.5      | 0.098            | 0.310            |
| Nymph development and survival                  |        |        |        |    |            |        |        |    |            |                  |                  |
| Dvptal time from hatching to adults             | 81.00  | 75.50  | 85.50  | 35 | 82.00      | 77.25  | 85.75  | 34 | 565.5      | 0.727            | 0.807            |
| Survival rate from hatching to day 14           | 84.38  | 77.50  | 90.00  | 35 | 85.16      | 75.37  | 91.37  | 34 | 572.0      | 0.786            | 0.807            |
| Survival rate from day 14 to adults             | 42.86  | 29.86  | 59.91  | 35 | 39.88      | 27.27  | 66.67  | 34 | 620.5      | 0.763            | 0.807            |

## 6-FIGURES

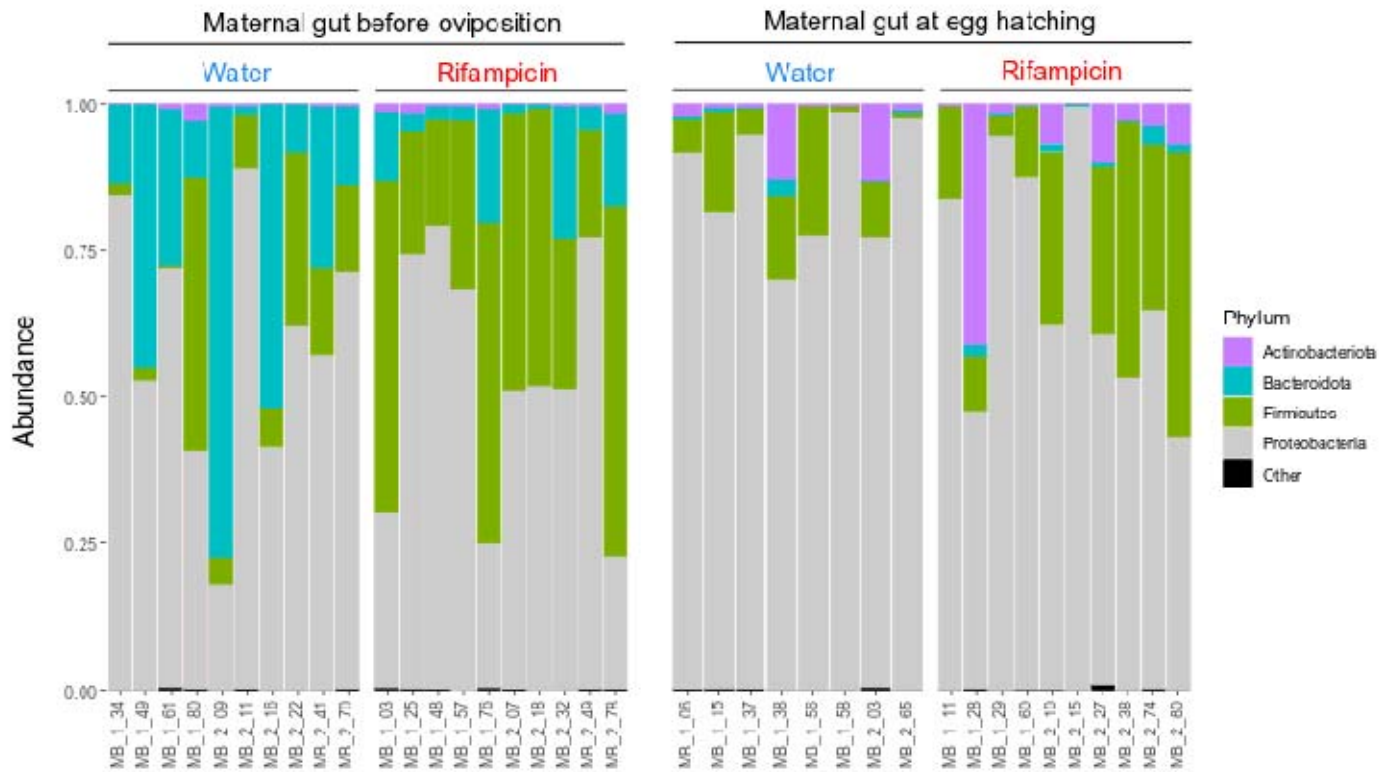

626 **Figure 1 – Gut microbial composition in females.** Guts were sampled either before oviposition  
627 or at egg hatching in females treated either with water or rifampicin. The ID of each female is  
628 provided on the x-axis. More details in table S3.



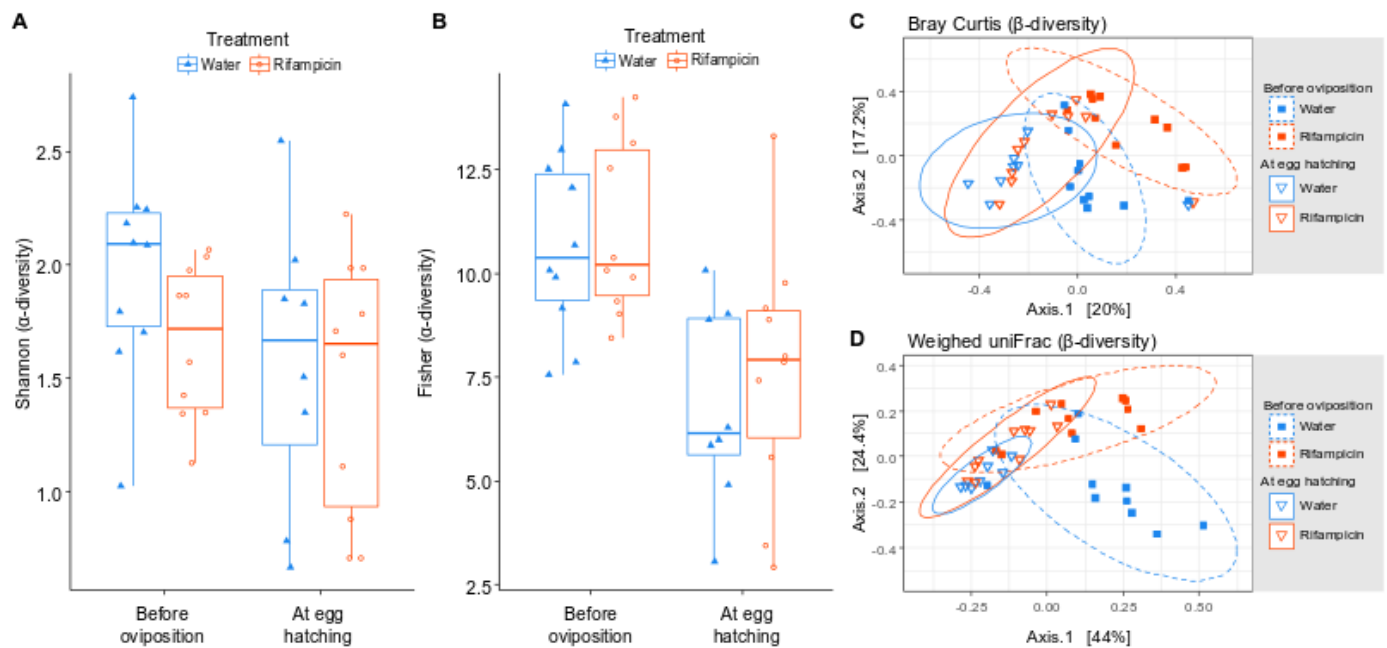

629 **Figure 2 – Effects of rifampicin and female sampling stage on gut microbial  $\alpha$ - and  $\beta$ -**  
630 **diversities.** Guts were sampled either before oviposition or at egg hatching in females treated  
631 either with water or rifampicin. (A, B) *Alpha*-diversity based on Shannon and Fisher indices  
632 (representative of all the tested metrics), respectively. Box plots depict median (middle bar)  
633 and interquartile range (box), with whiskers extending to 1.5 times the interquartile range and  
634 dots/triangles representing values of each sample. (C, D) *Beta*-diversity based on Bray-Curtis  
635 and weighed- uniFrac indices (representative of all the tested metrics). Illustrations report  
636 multidimensional scaling (MDS) results, where dots show values and ellipses represent 95%  
637 confidence intervals.

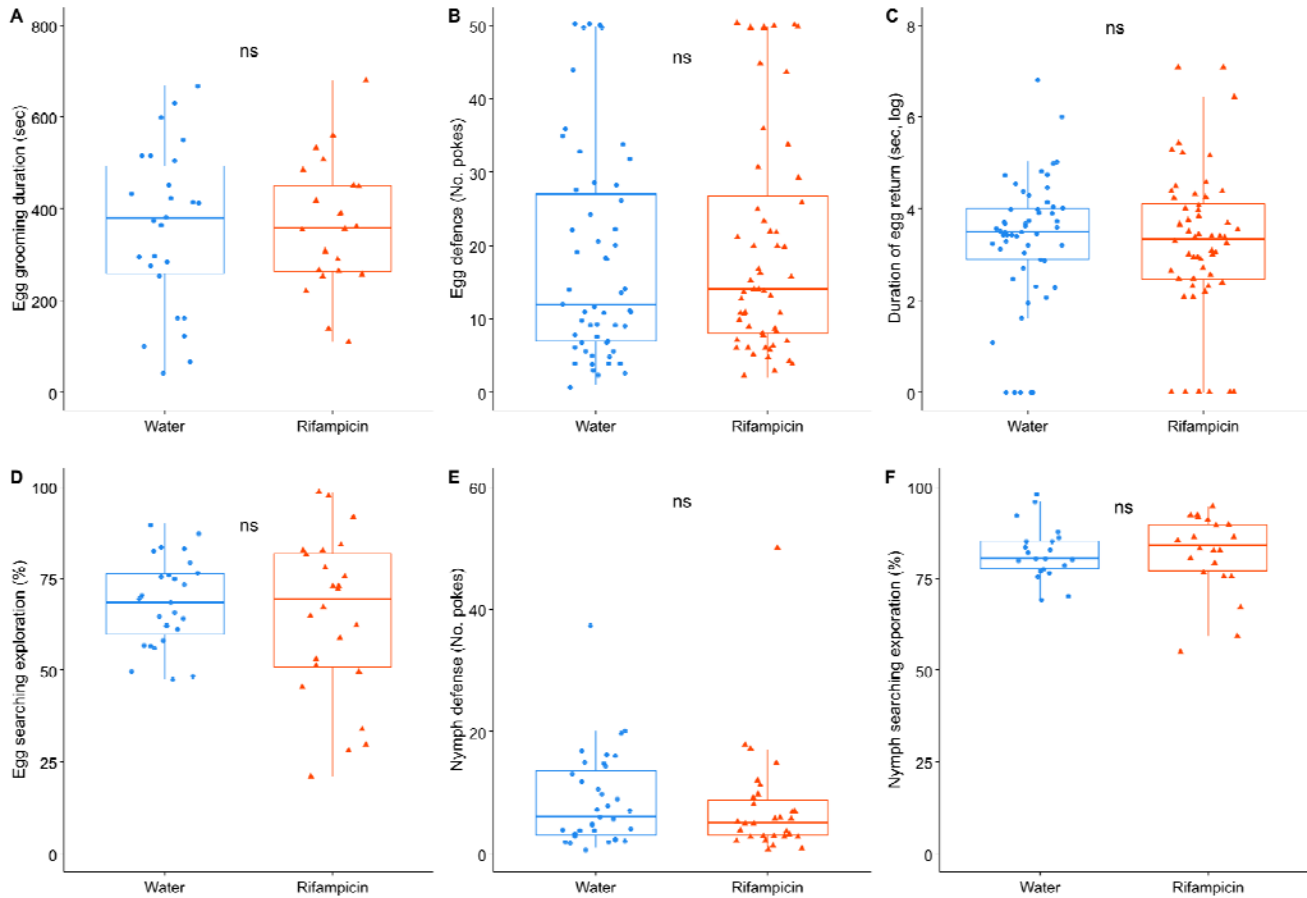

638 **Figure 3 – Effect of rifampicin on maternal care.** (A) duration of egg grooming, (B) egg defence  
639 against a simulated predator, (C) delay of maternal return after egg defence, (D) egg searching,  
640 (E) nymph defence against a simulated predator and (F) nymph searching. Box plots depict  
641 median (middle bar) and interquartile range (light bar), with whiskers extending to 1.5 times  
642 the interquartile range and dots representing experimental values. *ns* stands for  $P < 0.05$ .

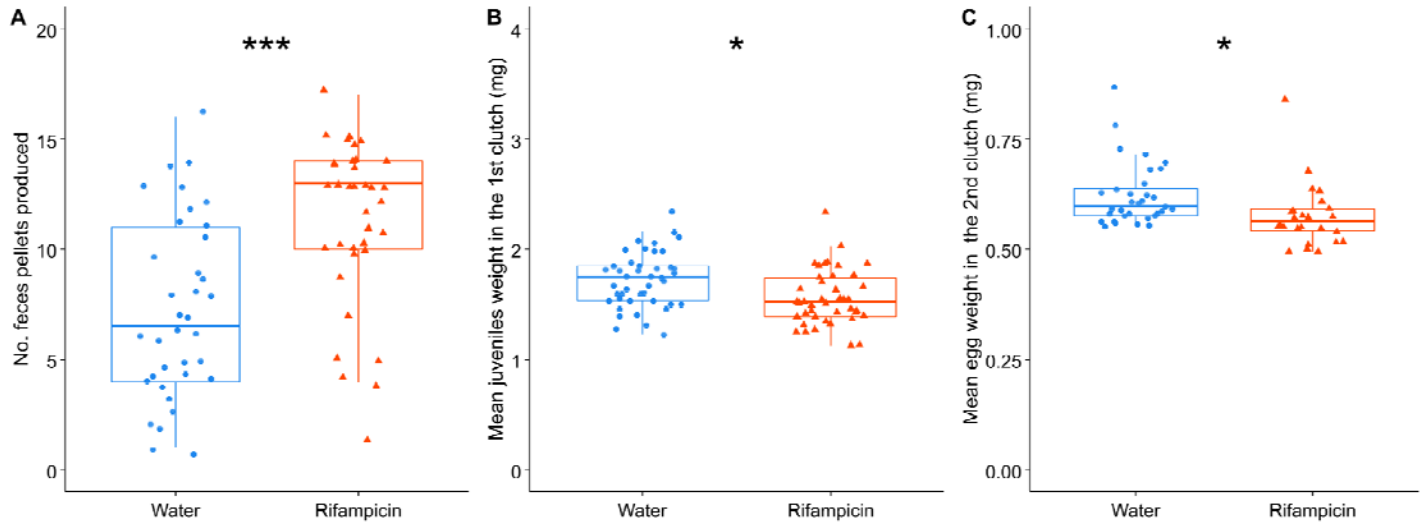

643 **Figure 4 – Effects of rifampicin on (A) females’ feces production, (B) mean juveniles weight in**  
644 **the first clutch and (C) mean egg weight in the 2<sup>nd</sup> clutch.** Box plots depict median (middle bar)  
645 and interquartile range (light bar), with whiskers extending to 1.5 times the interquartile range  
646 and dots representing experimental values. \*\*\* $P < 0.001$  and \* $P < 0.05$ .
